# Supplementary material
Source: Research Square preprint supplement (doi:10.21203/rs.3.rs-9744873/v1)
Supplement: Supplementary file 1 [file 234bc91990709c45c30c9201.docx]

**Supplementary Table 1 Sequences for siRNAs.**

| Gene names |  | Sequences(5’-3’) |
| --- | --- | --- |
| siHECTD2#1 | Sence | UGAGUGAGGCGGUUCGGGUTT |
| anti-sense | ACCCGAACCGCCUCACUCATT |
| siHECTD2#2 | Sence | CCUCAUUUAACACCAUUGATT |
|  | anti-sense | UCAAUGGUGUUAAAUGAGGTT |
| siHECTD2#3 | Sence | GAUGCAUCAUCAUCCGAAATT |
|  | anti-sense | UUUCGGAUGAUGAUGCAUCTT |
| si **SQSTM1**#1 | Sence | GAUGACAUCUUCCGAAUCUTT |
|  | anti-sense | AGAUUCGGAAGAUGUCAUCTT |
| si **SQSTM1**#2 | Sence | CAUCCAGUAUUCAAAGCAUTT |
|  | anti-sense | AUGCUUUGAAUACUGGAUGTT |
| si **SQSTM1**#3 | Sence | GAAUCAGCUUCUGGUCCAUTT |
|  | anti-sense | AUGGACCAGAAGCUGAUUCTT |
| si **SQSTM1**#4 | Sence | CAUUGAAGUUGAUAUCGAUTT |
|  | anti-sense | AUCGAUAUCAACUUCAAUGTT |
| Negative Control | Sence | UUCUCCGAACGUGUCACG |
|  | anti-sense | ACGUGACACGUUCGGAGAATT |

**Supplementary Table 2 Sequences for Primers.**

| Gene names |  | Sequences(5’-3’) |
| --- | --- | --- |
| hHECTD2 |  | F: AGTTCACCTGCACATCTTGTTT |
|  | R: GCCTTCATTTCGGATGATGATGC |
| hHSPA5 |  | F: CACGGTCTTTGACGCCAAG |
|  |  | R: CCAAATAAGCCTCAGCGGTTT |
| hGADD34 |  | F: AGCCACGGAGGATAAAAGAACA |
|  |  | R: CTGAACGATACTCCCAGGACC |
| hTXNDC5 |  | F: CAGAGCCGGAAGTGGAACC |
|  |  | R: CCACGGAGCGAAGAACTTGAT |
| hCHOP |  | F: GGAAACAGAGTGGTCATTCCC |
|  |  | R: CTGCTTGAGCCGTTCATTCTC |
| hATF-4 |  | F: CTCCGGGACAGATTGGATGTT |
|  |  | R: GGCTGCTTATTAGTCTCCTGGAC |
| hGAPDH |  | F: GGAGCGAGATCCCTCCAAAAT |
|  |  | R: GGCTGTTGTCATACTTCTCATGG |

**Supplementary figures**


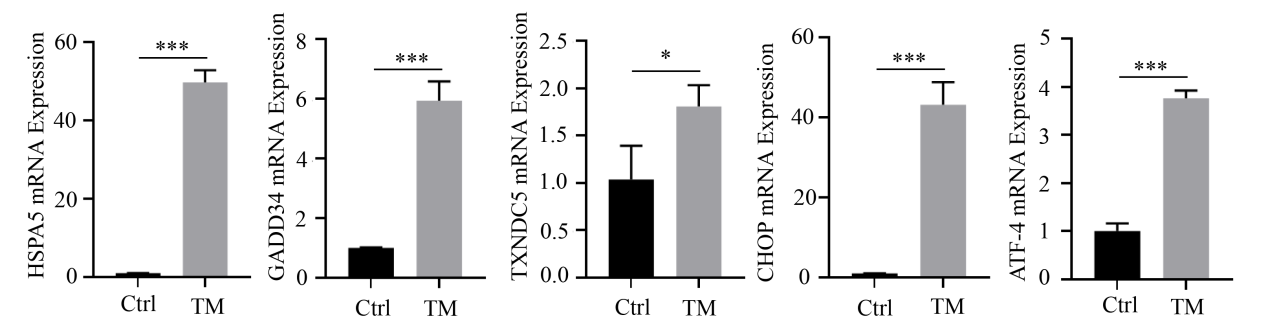


Supplementary Fig. 1 Expression of HSPA5, GADD34, TXNDC5, CHOP and ATF4 was detected in RA FLSs after stimulation with Tm (5μg/ml) for 12 h.


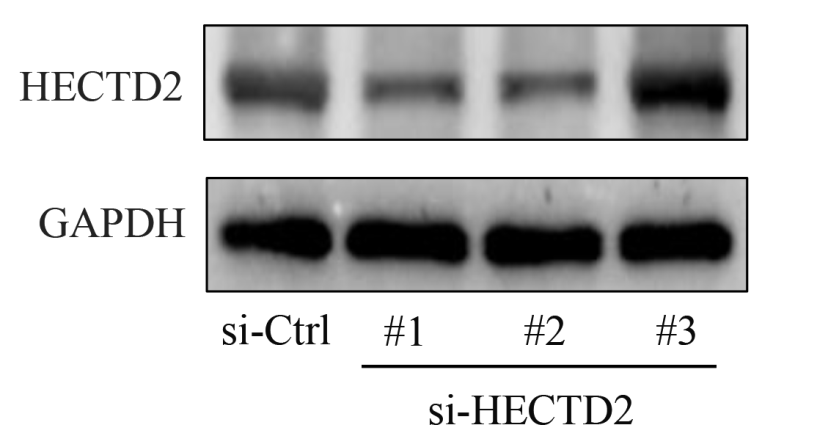


Supplementary Fig. 2 The silencing efficiency of HECTD2 siRNAs.


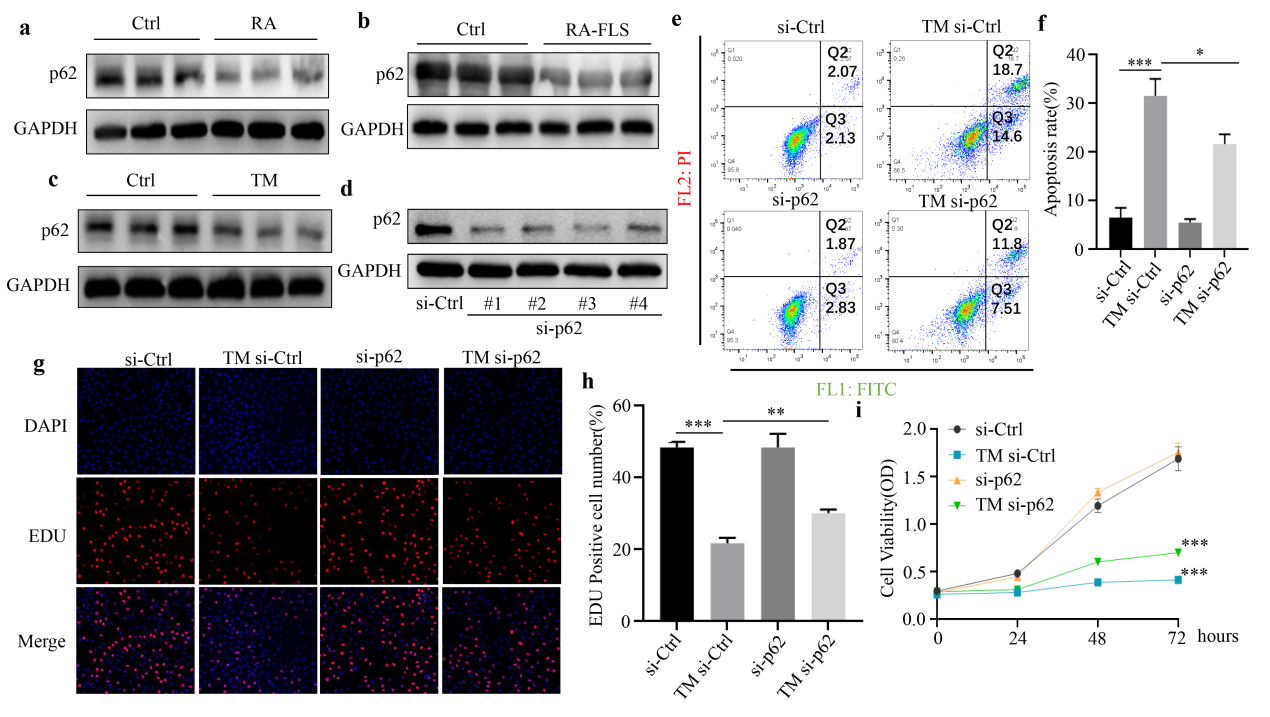
Supplementary Fig.3 Inhibition of p62 destroys the apoptosis resistance of RA-FLSs. **a,b** Expression ofp62 were detected in the synovial tissues and synovial fibroblasts from RA (n = 3) and OA (n = 3) patients by Western blot. c Expression ofp62 were detected in RA FLSs with the stimulation of Tm (5μg/ml) for 12 h. **d** The silencing efficiency of various p62 siRNAs were delectated by Western bolt. **e,f** Apoptosis was detected and evaluated by Annexin V staining. **g-i** Cell proliferation was determined by EdU staining and CCK-8 assay. The data are presented as the mean ± SD. * *p* < 0.05, ** *p* < 0.01, *** *p* < 0.001.
